# Supplementary material for: Developing Functional Relationships between Soil Moisture Content and Corn Early-Season Physiology, Growth, and Development
Source: MDPI journal article supplement (doi:10.3390/plants12132471), 2023-06-28
Supplement: s1 [file s1]

**Table S1** Summary of non-significant experiment × treatment interaction across biomass traits. Values indicate the coefficient of correlation ( $R^2$ ) of quadratic regression between soil moisture content and biomass-related traits.

| Trait                                                  | Experiment ×<br>Treatment | A6659VT2RIB ( $R^2$ ) |              | P1316YHR ( $R^2$ ) |              |
|--------------------------------------------------------|---------------------------|-----------------------|--------------|--------------------|--------------|
|                                                        |                           | Experiment 1          | Experiment 2 | Experiment 1       | Experiment 2 |
| Total leaf area (cm <sup>2</sup> plant <sup>-1</sup> ) | ns                        | 0.9                   | 0.96         | 0.97               | 0.95         |
| Shoot dry weight (g plant <sup>-1</sup> )              | ns                        | 0.95                  | 0.98         | 0.97               | 0.98         |
| Root dry weight (g plant <sup>-1</sup> )               | ns                        | 0.96                  | 0.91         | 0.95               | 0.71         |
| Total dry weight (g plant <sup>-1</sup> )              | ns                        | 0.97                  | 0.99         | 0.99               | 0.99         |
